# Supplementary material for: Innate Killing of Leishmania donovani by Macrophages of the Splenic Marginal Zone Requires IRF-7
Source: PLoS Pathog. 2010 Mar 12;6(3):e1000813. doi: 10.1371/journal.ppat.1000813 (PMC2837405; doi:10.1371/journal.ppat.1000813)
Supplement: Table S2 — Up- and down-regulated genes in 14M1.4 cells at 48h (0.12 MB XLS) [file ppat.1000813.s008.xls]

## Sheet: Fold Change 2F Up (14M1.4, 48h)
14M1.4 2F UP (48h)
Gene Name	Fold Change	Description
1418126_at	23.66	chemokine (C-C motif) ligand 5
1450291_s_at	16.13
1450826_a_at	15.79	serum amyloid A 3
1420671_x_at	13.1	membrane-spanning 4-domains, subfamily A, member 4C
1435331_at	11.82	expressed sequence AI447904
1418422_at	10.19	serine (or cysteine) proteinase inhibitor, clade B, member 9f
1418930_at	10.19	chemokine (C-X-C motif) ligand 10
1435529_at	9.514	K0731F11-3 NIA Mouse Hematopoietic Stem Cell (Lin-/c-Kit-/Sca-1-) cDNA Library (Long) Mus musculus cDNA clone NIA:K0731F11 IMAGE:30076582 3', mRNA sequence.
1421009_at	8.955	RIKEN cDNA 2510004L01 gene
1416371_at	7.495	apolipoprotein D
1451905_a_at	6.926	myxovirus (influenza virus) resistance 1
1421008_at	6.831	RIKEN cDNA 2510004L01 gene
1418293_at	6.644	interferon-induced protein with tetratricopeptide repeats 2
1418423_s_at	6.628	serine (or cysteine) proteinase inhibitor, clade B, member 9f
1419676_at	6.558	myxovirus (influenza virus) resistance 2
1439505_at	6.526	chloride intracellular channel 5
1450484_a_at	6.526	thymidylate kinase family LPS-inducible member
1436058_at	6.503	RIKEN cDNA 2510004L01 gene
1450322_s_at	6.198	schlafen 3
1417244_a_at	5.822	interferon regulatory factor 7
1450424_a_at	5.647	interleukin 18 binding protein
1418536_at	5.528	histocompatibility 2, Q region locus 7
1419714_at	5.377	programmed cell death 1 ligand 1
1425119_at	5.371	2'-5' oligoadenylate synthetase 1B
1419728_at	5.064	chemokine (C-X-C motif) ligand 5
1454111_at	5.046	RIKEN cDNA 3230401D17 gene
1436687_x_at	5.043	RIKEN cDNA 3110006P09 gene
1417516_at	4.921	DNA-damage inducible transcript 3
1451644_a_at	4.891	histocompatibility 2, Q region locus 1
1432026_a_at	4.751	RIKEN cDNA 2510038N07 gene
1422095_a_at	4.722	thymidylate kinase family LPS-inducible member
1452349_x_at	4.683	interferon activated gene 205
1423285_at	4.439	coagulation factor C homolog (Limulus polyphemus)
1419209_at	4.359	chemokine (C-X-C motif) ligand 1
1418021_at	4.356	complement component 4 (within H-2S)
1457300_at	4.285	RIKEN cDNA 9130023F12 gene
1453757_at	4.255	RIKEN cDNA 2510038N07 gene
1438311_at	4.231	RIKEN cDNA 2010002M12 gene
1434372_at	4.176	Transcribed sequences
1419604_at	4.165	Z-DNA binding protein 1
1425008_a_at	4.153	interferon activated gene 203
1448961_at	4.126	phospholipid scramblase 2
1434195_at	4.106	RIKEN cDNA 6030424L22 gene
1424923_at	4.091	serine (or cysteine) proteinase inhibitor, clade A, member 3G
1444721_at	4.07	Transcribed sequence with weak similarity to protein ref:NP_055010.1 (M.musculus) L1 repeat, Tf subfamily, member 29 [Mus musculus]
1427102_at	4.013	schlafen 4
1438037_at	3.978	RIKEN cDNA 2510038N07 gene
1431008_at	3.974	RIKEN cDNA 0610037M15 gene
1450297_at	3.928	interleukin 6
1426065_a_at	3.907	induced in fatty liver dystrophy 2
1416676_at	3.903	histidine-rich glycoprotein
1460416_s_at	3.892	HSR; Mouse HSR mRNA, clone pMmHSRc-[1,3,3E,10 and 10E].
1425603_at	3.873	RIKEN cDNA 0610011I04 gene
1423467_at	3.83	membrane-spanning 4-domains, subfamily A, member 4B
1456873_at	3.809	BB236747 RIKEN full-length enriched, 3 days neonate thymus Mus musculus cDNA clone A630060P09 3', mRNA sequence.
1423555_a_at	3.79	RIKEN cDNA A430056A10 gene
1431095_a_at	3.749	RIKEN cDNA 2510038N07 gene
1438868_at	3.665	PHD finger protein 11
1447845_s_at	3.663	vanin 1
1422781_at	3.662	toll-like receptor 3
1418178_at	3.653	internexin neuronal intermediate filament protein, alpha
1450534_x_at	3.64	histocompatibility 2, Q region locus 1
1422782_s_at	3.589	toll-like receptor 3
1420773_at	3.572	deubiquitinating enzyme 1
1418675_at	3.558	oncostatin M receptor
1457644_s_at	3.558	chemokine (C-X-C motif) ligand 1
1439831_at	3.545	Transcribed sequences
1459463_at	3.53	Adult male spinal cord cDNA, RIKEN full-length enriched library, clone:A330073N09 product:unknown EST, full insert sequence
1452639_at	3.456	ectonucleotide pyrophosphatase/phosphodiesterase 4
1424938_at	3.448	six transmembrane epithelial antigen of the prostate
1434457_at	3.437	nuclear antigen Sp100
1418392_a_at	3.416	guanylate nucleotide binding protein 3
1437832_x_at	3.379	tryptophanyl-tRNA synthetase
1429947_a_at	3.333	Z-DNA binding protein 1
1446967_at	3.297	0 day neonate eyeball cDNA, RIKEN full-length enriched library, clone:E130106L10 product:unclassifiable, full insert sequence
1438613_at	3.297	BB131475 RIKEN full-length enriched, 16 days neonate cerebellum Mus musculus cDNA clone 9630053G12 3', mRNA sequence.
1426318_at	3.287	serine (or cysteine) proteinase inhibitor, clade B, member 1b
1425106_a_at	3.266	tryptophanyl-tRNA synthetase
1450170_x_at	3.264	histocompatibility 2, D region locus 1
1426324_at	3.263	histocompatibility 2, D region locus 1
1417141_at	3.242	interferon gamma induced GTPase
1426971_at	3.211	unnamed protein product; putative similar to UBIQUITIN-ACTIVATING ENZYME E1 [Homo sapiens] (SPTR|Q9BRB2, evidence: FASTY, 71.5%ID, 99.1%length, match=3016); Mus musculus adult male liver cDNA, RIKEN full-length enriched library, clone:1300004C08 product:similar to UBIQUITIN-ACTIVATING ENZYME E1 [Homo sapiens], full insert sequence.
1429570_at	3.2	RIKEN cDNA 9130019I15 gene
1418191_at	3.188	ubiquitin specific protease 18
1418674_at	3.184	oncostatin M receptor
1420768_a_at	3.181	DNA segment, Chr 11, Lothar Hennighausen 2, expressed
1443728_at	3.17	Transcribed sequence with strong similarity to protein sp:P00722 (E. coli) BGAL_ECOLI Beta-galactosidase
1419603_at	3.153	interferon, gamma-inducible protein 16
1427746_x_at	3.149	MHC I=H-2Kd homolog {alternatively spliced, deletion of exon 3} [mice, DBA/2, L1210 lymphoma, mRNA Mutant, 855 nt]
1418726_a_at	3.14	troponin T2, cardiac
1419282_at	3.136	chemokine (C-C motif) ligand 12
1425719_a_at	3.132	N-myc (and STAT) interactor
1422141_s_at	3.128	component of Sp100-rs
1451532_s_at	3.125	six transmembrane epithelial antigen of the prostate
1431591_s_at	3.122	Mus musculus adult male hippocampus cDNA, RIKEN full-length enriched library, clone:2900034J12 product:interferon-stimulated protein (15 kDa), full insert sequence.
1451426_at	3.107	DNA segment, Chr 11, Lothar Hennighausen 2, expressed
1428660_s_at	3.104	torsin family 3, member A
1445881_at	3.102	Adult male tongue cDNA, RIKEN full-length enriched library, clone:2310035P21 product:unknown EST, full insert sequence
1418666_at	3.092	pentaxin related gene
1460038_at	3.086	POU domain, class 3, transcription factor 1
1450696_at	3.078	proteosome (prosome, macropain) subunit, beta type 9 (large multifunctional protease 2)
1442539_at	3.077	Transcribed sequence with weak similarity to protein ref:NP_081764.1 (M.musculus) RIKEN cDNA 5730493B19 [Mus musculus]
1437190_at	3.075	expressed sequence AI326477
1449591_at	3.068	caspase 4, apoptosis-related cysteine protease
1451593_at	3.065	histocompatibility 2, Q region locus 1
1436712_at	3.065	phospholipase A2, group IVC
1449033_at	3.06	tumor necrosis factor receptor superfamily, member 11b (osteoprotegerin)
1437636_at	3.026	BB135602 RIKEN full-length enriched, adult male bone Mus musculus cDNA clone 9830128E13 3', mRNA sequence.
1437847_x_at	3.023	AV130230 Mus musculus C57BL/6J 11-day embryo Mus musculus cDNA clone 2700075C05, mRNA sequence.
1431648_at	2.987	RIKEN cDNA 4930528F23 gene
1422140_at	2.983	component of Sp100-rs
1432524_at	2.966	RIKEN cDNA 4930550G17 gene
1427660_x_at	2.964	immunoglobulin kappa chain variable 8 (V8)
1450783_at	2.957	interferon-induced protein with tetratricopeptide repeats 1
1429212_a_at	2.945	RIKEN cDNA 1700008D07 gene
1426276_at	2.943	RIKEN cDNA 9130009C22 gene
1434813_x_at	2.937	tryptophanyl-tRNA synthetase
1439114_at	2.923	hypothetical protein 9830118M07
1424617_at	2.91	interferon-induced protein 35
1424775_at	2.898	2'-5' oligoadenylate synthetase 1G
1459913_at	2.898	Adult male spinal cord cDNA, RIKEN full-length enriched library, clone:A330042I21 product:unknown EST, full insert sequence
1418004_a_at	2.888	RIKEN cDNA 1810009M01 gene
1427736_a_at	2.875	chemokine (C-C motif) receptor-like 2
1416154_at	2.868	RIKEN cDNA 4930511A21 gene
1451655_at	2.864	schlafen 8
1427091_at	2.86	expressed sequence AI481105
1451382_at	2.84	RIKEN cDNA 1810008K03 gene
1425728_at	2.839	CDNA clone MGC:6071 IMAGE:3492410, complete cds
1434939_at	2.837	forkhead box F1a
1452676_a_at	2.828	BB777815 RIKEN full-length enriched, Nullipotent stem cell CRL-2070 NE cDNA Mus musculus cDNA clone G430042F07 3', mRNA sequence.
1448632_at	2.826	proteasome (prosome, macropain) subunit, beta type 10
1420048_at	2.823	Adult male hypothalamus cDNA, RIKEN full-length enriched library, clone:A230020L22 product:unknown EST, full insert sequence
1437365_at	2.805	expressed sequence AU022521
1449484_at	2.796	stanniocalcin 2
1444064_at	2.795	SAM domain and HD domain, 1
1423062_at	2.794	insulin-like growth factor binding protein 3
1425239_at	2.787	open reading frame 21
1450672_a_at	2.786	three prime repair exonuclease 1
1453939_x_at	2.773	Mus musculus adult male hippocampus cDNA, RIKEN full-length enriched library, clone:2900034J12 product:interferon-stimulated protein (15 kDa), full insert sequence.
1444288_at	2.756	polyribonucleotide nucleotidyltransferase 1
1434580_at	2.749	ectonucleotide pyrophosphatase/phosphodiesterase 4
1444307_at	2.745	Transcribed sequences
1456225_x_at	2.745	induced in fatty liver dystrophy 2
1455500_at	2.742	DNA segment, Chr 11, ERATO Doi 759, expressed
1421550_a_at	2.736	tripartite motif protein 34
1443598_at	2.731	Transcribed sequence with weak similarity to protein pir:B44366 (H.sapiens) B44366 zinc finger protein ZNF126 - human
1451777_at	2.721	cDNA sequence BC013672
1428333_at	2.71	RIKEN cDNA 6530401D17 gene
1444619_x_at	2.705	AV068122 Mus musculus small intestine C57BL/6J adult Mus musculus cDNA clone 2010301J23, mRNA sequence.
1457426_at	2.698	Adult male testis cDNA, RIKEN full-length enriched library, clone:1700048O20 product:hypothetical KRAB box containing protein, full insert sequence
1438676_at	2.693	expressed sequence AI595338
1437176_at	2.681	Transcribed sequences
1447285_at	2.673	H3111E10-3 NIA Mouse 15K cDNA Clone Set Mus musculus cDNA clone H3111E10 3', mRNA sequence.
1435792_at	2.672	component of Sp100-rs
1416016_at	2.668	proteosome (prosome, macropain) subunit, beta type 9 (large multifunctional protease 2)
1454102_at	2.658	3 days neonate thymus cDNA, RIKEN full-length enriched library, clone:A630061A06 product:unclassifiable, full insert sequence
1420691_at	2.656	interleukin 2 receptor, alpha chain
1450552_at	2.656	ATPase, H+ transporting, V1 subunit E-like 2 isoform 2
1434046_at	2.651	CDNA clone MGC:58382 IMAGE:6774154, complete cds
1450687_at	2.647	insulin-like growth factor 2, binding protein 3
1449558_at	2.637	coagulation factor VIII
1444759_at	2.635	prickle like 1 (Drosophila)
1451567_a_at	2.632	interferon activated gene 203
1426243_at	2.626	cystathionase (cystathionine gamma-lyase)
1440481_at	2.617	Transcribed sequences
1419762_at	2.617	ubiquitin D
1425374_at	2.612	2'-5' oligoadenylate synthetase 3
1418486_at	2.607	vanin 1
1434139_at	2.593	RIKEN cDNA 5330431N24 gene
1450165_at	2.564	schlafen 2
1457666_s_at	2.56	interferon activated gene 202B
1440914_s_at	2.558	RIKEN cDNA 9130023F12 gene
1455566_s_at	2.555	RIKEN cDNA 2810022L02 gene
1458589_at	2.532	13 days embryo lung cDNA, RIKEN full-length enriched library, clone:D430030N05 product:unknown EST, full insert sequence
1415694_at	2.53	tryptophanyl-tRNA synthetase
1442956_at	2.527	10 days neonate cerebellum cDNA, RIKEN full-length enriched library, clone:B930009B01 product:unknown EST, full insert sequence
1441174_a_at	2.525	leishmanolysin-like (metallopeptidase M8 family)
1448940_at	2.52	tripartite motif protein 21
1450454_at	2.52	torsin family 3, member A
1421998_at	2.515	torsin family 3, member A
1459151_x_at	2.514	interferon-induced protein 35
1434380_at	2.508	Diabetic nephropathy-related gene 1 mRNA, partial sequence
1426970_a_at	2.506	unnamed protein product; putative similar to UBIQUITIN-ACTIVATING ENZYME E1 [Homo sapiens] (SPTR|Q9BRB2, evidence: FASTY, 71.5%ID, 99.1%length, match=3016); Mus musculus adult male liver cDNA, RIKEN full-length enriched library, clone:1300004C08 product:similar to UBIQUITIN-ACTIVATING ENZYME E1 [Homo sapiens], full insert sequence.
1421228_at	2.505	chemokine (C-C motif) ligand 7
1431389_at	2.5	RIKEN cDNA 3110043L15 gene
1438287_x_at	2.499	AV309422 RIKEN full-length enriched, 8 days embryo Mus musculus cDNA clone 5730581M04 3' similar to AF063447 Rattus norvegicus nuclear RNA helicase mRNA, mRNA sequence.
1445425_at	2.481	3 days neonate thymus cDNA, RIKEN full-length enriched library, clone:A630042D17 product:unclassifiable, full insert sequence
1449534_at	2.481	synaptonemal complex protein 3
1437189_x_at	2.48	dendritic cell protein GA17
1427053_at	2.48	RIKEN cDNA D930038M13 gene
1443673_x_at	2.471	BB710847 RIKEN full-length enriched, 2 cells egg Mus musculus cDNA clone B020018M09 3', mRNA sequence.
1425917_at	2.469	histocompatibility 28
1418131_at	2.469	SAM domain and HD domain, 1
1420360_at	2.464	dickkopf homolog 1 (Xenopus laevis)
1429299_at	2.46	dimethylarginine dimethylaminohydrolase 1
1435872_at	2.449	proviral integration site 1
1425403_at	2.448	RIKEN cDNA 9630020E24 gene
1443556_at	2.445	RIKEN cDNA 1110007F12 gene
1452348_s_at	2.443	interferon activated gene 205
1440045_at	2.443	crystallin, zeta (quinone reductase)-like 1
1420557_at	2.44	Eph receptor A5
1444671_at	2.44	15 days embryo head cDNA, RIKEN full-length enriched library, clone:D930012M13 product:unknown EST, full insert sequence
1436472_at	2.436	603276165F1 NCI_CGAP_Mam3 Mus musculus cDNA clone IMAGE:5316377 5', mRNA sequence.
1435840_x_at	2.43	Transcribed sequence with weak similarity to protein ref:NP_061226.1 (M.musculus) 2-cell-stage, variable group, member 1; variable group of 2-cell-stage gene family [Mus musculus]
1448366_at	2.43	syntaxin 1A (brain)
1445897_s_at	2.423	interferon-induced protein 35
1417292_at	2.421	olfactory receptor 56
1434025_at	2.42	Kruppel-like factor 5
1424339_at	2.42	2'-5' oligoadenylate synthetase-like 1
1419026_at	2.417	Fas death domain-associated protein
1422297_at	2.41	prefoldin 5
1451050_at	2.41	5'-nucleotidase, cytosolic III
1425357_a_at	2.404	cysteine knot superfamily 1, BMP antagonist 1
1433966_x_at	2.401	asparagine synthetase
1451544_at	2.391	similar to hypothetical protein FLJ10143
1420130_s_at	2.39	DNA segment, Chr 10, Wayne State University 52, expressed
1422562_at	2.39	Ras-related associated with diabetes
1424857_a_at	2.385	tripartite motif protein 34
1449630_s_at	2.384	MAP/microtubule affinity-regulating kinase 1
1418686_at	2.382	2'-5' oligoadenylate synthetase 1C
1425156_at	2.378	RIKEN cDNA 9830147J24 gene
1430427_a_at	2.373	protocadherin 18
1454311_at	2.365	BB029361 RIKEN full-length enriched, adult male thymus Mus musculus cDNA clone 5830443G21 3', mRNA sequence.
1456078_x_at	2.361	BB012080 RIKEN full-length enriched, adult male testis (DH10B) Mus musculus cDNA clone 4930407C07 3' similar to X60785 Cricetulus griseus (chinese hamster) mRNA for beta tubulin (clone B3T), mRNA sequence.
1442844_at	2.361	RIKEN cDNA A830052D11 gene
1456494_a_at	2.359	tripartite motif protein 30-like
1451860_a_at	2.357	tripartite motif protein 30
1443698_at	2.352	Adult male cortex cDNA, RIKEN full-length enriched library, clone:B530033B21 product:unknown EST, full insert sequence
1435454_a_at	2.352	cDNA sequence BC006779
1450871_a_at	2.349	branched chain aminotransferase 1, cytosolic
1417483_at	2.349	expreexpressed sequence AA408868
1459989_at	2.345	AV271189 RIKEN full-length enriched, adult male testis (DH10B) Mus musculus cDNA clone 4931406J23 3', mRNA sequence.
1422967_a_at	2.342	transferrin receptor
1446457_at	2.341	RIKEN cDNA 6430573D20 gene
1459868_x_at	2.341	AV313111 RIKEN full-length enriched, adult male thymus Mus musculus cDNA clone 5830408C01 3' similar to X74953 M.musculus ETL-2 mRNA, mRNA sequence.
1457036_at	2.338	RIKEN cDNA 1810073K19 gene
1457980_x_at	2.335	BB245119 RIKEN full-length enriched, 7 days neonate cerebellum Mus musculus cDNA clone A730007E22 3', mRNA sequence.
1449556_at	2.334	histocompatibility 2, T region locus 23
1452408_at	2.332	Adult female vagina cDNA, RIKEN full-length enriched library, clone:9930022F21 product:similar to G PROTEIN COUPLED RECEPTOR [Mus musculus], full insert sequence
1434438_at	2.331	SAM domain and HD domain, 1
1418240_at	2.33	guanylate nucleotide binding protein 2
1425394_at	2.33	cDNA sequence BC023105
1424518_at	2.329	hypothetical protein LOC223672
1458381_at	2.327	chloride intracellular channel 5
1421596_s_at	2.325	histocompatibility 28
1429273_at	2.321	BMP-binding endothelial regulator
1457689_at	2.321	RIKEN cDNA B430219L04 gene
1419350_at	2.321	hook homolog 2 (Drosophila)
1460375_at	2.319	RIKEN cDNA 0610038D11 gene
1428136_at	2.319	secreted frizzled-related sequence protein 1
1453957_a_at	2.318	insulin-like growth factor 2, binding protein 3
1428067_at	2.318	RAS-like, family 12
1449460_at	2.317	ankyrin repeat and SOCS box-containing protein 13
1421524_at	2.316	cripto, FRL-1, cryptic family 1
1420549_at	2.311	guanylate nucleotide binding protein 1
1417172_at	2.309	ubiquitin-conjugating enzyme E2L 6
1417470_at	2.297	apolipoprotein B editing complex 3
1457035_at	2.295	interferon-activatable protein
1419666_x_at	2.292	nuclear protein 1
1451564_at	2.29	cDNA sequence BC021340
1419624_a_at	2.29	RIKEN cDNA 1700010I14 gene
1436442_at	2.289	protein tyrosine phosphatase, non-receptor type 14
1444412_at	2.284	Transcribed sequences
1436172_at	2.276	Adult male testis cDNA, RIKEN full-length enriched library, clone:4921508F21 product:similar to HISTOCOMPATIBILITY 2, CLASS II ANTIGEN E BETA [Mus musculus], full insert sequence
1416380_at	2.274	Moloney leukemia virus 10
1460471_at	2.273	BB702364 RIKEN full-length enriched, in vitro fertilized eggs Mus musculus cDNA clone 7420440K06 3', mRNA sequence.
1424999_at	2.272	RIKEN cDNA 1700022C21 gene
1436204_at	2.271	18-day embryo whole body cDNA, RIKEN full-length enriched library, clone:1110059G02 product:unclassifiable, full insert sequence
1438490_at	2.271	solute carrier family 39 (zinc transporter), member 14
1451696_at	2.27	zinc finger protein 64
1432284_at	2.27	mirror-image polydactyly gene 1 homolog (human)
1451821_a_at	2.269	nuclear antigen Sp100
1424948_x_at	2.269	histocompatibility 2, K region
1447860_x_at	2.269	BB235941 RIKEN full-length enriched, 3 days neonate thymus Mus musculus cDNA clone A630056I23 3', mRNA sequence.
1424354_at	2.268	RIKEN cDNA 1110007F12 gene
1418932_at	2.265	nuclear factor, interleukin 3, regulated
1416521_at	2.264	selenoprotein W, muscle 1
1420183_at	2.26	loricrin
1437034_x_at	2.259	myristoylated alanine rich protein kinase C substrate
1443942_at	2.253	0 day neonate thymus cDNA, RIKEN full-length enriched library, clone:A430024B14 product:unknown EST, full insert sequence
1449681_at	2.252	hepatoma-derived growth factor
1452387_a_at	2.251	angiomotin like 2
1433693_x_at	2.251	vesicle-associated membrane protein 3
1452704_at	2.25	RIKEN cDNA 1200015F23 gene
1436904_at	2.245	hypothetical protein D030023K18
1426133_a_at	2.244	RIKEN cDNA 1500032H18 gene
1444754_at	2.244	RIKEN cDNA 4930556B16 gene
1452289_a_at	2.243	RIKEN cDNA 2410006N06 gene
1444029_at	2.243	RIKEN cDNA 5330431N24 gene
1426092_a_at	2.242	tripartite motif protein 34
1441409_at	2.24	expressed sequence AI449705
1456635_at	2.237	RIKEN cDNA 5830484A20 gene
1417262_at	2.236	prostaglandin-endoperoxide synthase 2
1444089_at	2.23	spectrin beta 2
1443801_at	2.229	Transcribed sequence with weak similarity to protein ref:NP_081764.1 (M.musculus) RIKEN cDNA 5730493B19 [Mus musculus]
1442245_at	2.228	Transcribed sequences
1448239_at	2.226	heme oxygenase (decycling) 1
1419204_at	2.223	delta-like 1 (Drosophila)
1451335_at	2.221	placenta-specific 8
1426657_s_at	2.22	3-phosphoglycerate dehydrogenase
1430150_at	2.22	RIKEN cDNA 5730537H01 gene
1445571_at	2.219	mn10h11.x1 Beddington mouse embryonic region Mus musculus cDNA clone IMAGE:537573 3', mRNA sequence.
1429874_at	2.217	RIKEN cDNA 4930513F16 gene
1448436_a_at	2.216	interferon regulatory factor 1
1449875_s_at	2.214	histocompatibility 2, T region locus 10
1424651_at	2.209	cDNA sequence BC021611
1460364_at	2.209	general transcription factor II I repeat domain-containing 1
1458644_at	2.206	2 days pregnant adult female oviduct cDNA, RIKEN full-length enriched library, clone:E230007N22 product:unknown EST, full insert sequence
1426084_a_at	2.206	hypothetical protein MGC6357
1428365_a_at	2.206	protease, serine, 15
1442201_at	2.205	Transcribed sequences
1422160_at	2.205	histocompatibility 2, T region locus 24
1431788_at	2.205	RIKEN cDNA 1700008G05 gene
1438716_at	2.205	tripartite motif protein 30-like
1438423_at	2.204	single-stranded DNA binding protein 2
1439766_x_at	2.204	vascular endothelial growth factor C
1419401_at	2.204	ankyrin repeat and SOCS box-containing protein 13
1438514_at	2.202	RIKEN cDNA 9130221N23 gene
1437621_x_at	2.197	AV216768 RIKEN full-length enriched, ES cells Mus musculus cDNA clone 2410167D16 3' similar to L21027 Mus musculus A10 mRNA, mRNA sequence.
1421344_a_at	2.196	ajuba
1449459_s_at	2.194	ankyrin repeat and SOCS box-containing protein 13
1452178_at	2.194	Similar to Plec1 protein (LOC381010), mRNA
1457900_at	2.193	helicase, ATP binding 1
1448785_at	2.193	CBFA2T1 identified gene homolog (human)
1419042_at	2.193	expressed sequence AW111922
1447615_at	2.187	Transcribed sequences
1418077_at	2.181	tripartite motif protein 21
1415673_at	2.178	phosphoserine phosphatase
1421812_at	2.175	TAP binding protein
1441339_at	2.174	RIKEN cDNA A330063D19 gene
1427164_at	2.173	interleukin 13 receptor, alpha 1
1421911_at	2.173	signal transducer and activator of transcription 2
1438027_at	2.166	BB668084 RIKEN full-length enriched, 2 days neonate thymus thymic cells Mus musculus cDNA clone C920021A02 3', mRNA sequence.
1451775_s_at	2.164	interleukin 13 receptor, alpha 1
1449639_at	2.164	Transcribed sequences
1458482_at	2.162	RIKEN cDNA D830019J24 gene
1448575_at	2.152	interleukin 7 receptor
1441876_x_at	2.152	zinc finger protein 93
1454714_x_at	2.151	Transcribed sequence with strong similarity to protein sp:Q61753 (M.musculus) SERA_MOUSE D-3-phosphoglycerate dehydrogenase
1420345_at	2.146	claudin 14
1418955_at	2.145	zinc finger protein 93
1419417_at	2.144	vascular endothelial growth factor C
1435665_at	2.143	tripartite motif protein 30-like
1455453_at	2.142	Clone IMAGE:3329409, mRNA
1419569_a_at	2.142	interferon-stimulated protein
1432224_at	2.141	0 day neonate head cDNA, RIKEN full-length enriched library, clone:4831407H17 product:unclassifiable, full insert sequence
1455692_x_at	2.14	Adult male testis cDNA, RIKEN full-length enriched library, clone:1700122G02 product:unknown EST, full insert sequence
1422962_a_at	2.14	proteosome (prosome, macropain) subunit, beta type 8 (large multifunctional protease 7)
1428390_at	2.14	RIKEN cDNA 2610318G08 gene
1439825_at	2.139	cDNA sequence BC023741
1456779_a_at	2.137	Adult male testis cDNA, RIKEN full-length enriched library, clone:4930414L22 product:unknown EST, full insert sequence
1441531_at	2.137	phospholipase C, beta 4
1448728_a_at	2.137	expreexpressed sequence AA408868
1419665_a_at	2.136	nuclear protein 1
1423836_at	2.133	zinc finger protein 503
1448757_at	2.132	promyelocytic leukemia
1450033_a_at	2.128	signal transducer and activator of transcription 1
1427363_at	2.128	Adult female vagina cDNA, RIKEN full-length enriched library, clone:9930007B02 product:unclassifiable, full insert sequence
1428653_x_at	2.128	ELAV (embryonic lethal, abnormal vision, Drosophila)-like 1 (Hu antigen R)
1425155_x_at	2.127	colony stimulating factor 1 (macrophage)
1457567_at	2.126	Transcribed sequences
1455899_x_at	2.123	suppressor of cytokine signaling 3
1456897_at	2.122	0 day neonate thymus cDNA, RIKEN full-length enriched library, clone:A430021A20 product:unknown EST, full insert sequence
1440262_at	2.119	Transcribed sequences
1417793_at	2.119	synonym: GTPI; go_component: cellular_component unknown [goid 0008372] [evidence ND]; go_function: GTPase activity [goid 0003924] [evidence ISS] [pmid 9862701]; go_process: biological_process unknown [goid 0000004] [evidence ND]; Mus musculus expressed sequence AI481100 (AI481100), mRNA.
1448468_a_at	2.117	potassium voltage-gated channel, shaker-related subfamily, beta member 1
1429613_at	2.117	RIKEN cDNA 0710001B24 gene
1447213_at	2.115	Clone IMAGE:4925729, mRNA
1424490_at	2.114	RIKEN cDNA 2410005H09 gene
1420915_at	2.114	signal transducer and activator of transcription 1
1439071_at	2.109	6 days neonate head cDNA, RIKEN full-length enriched library, clone:5430416N02 product:unknown EST, full insert sequence
1429819_at	2.108	Mus musculus 8 days embryo whole body cDNA, RIKEN full-length enriched library, clone:5730441G13 product:NMN adenylyltransferase; nicotinamide mononucleotide adenylyl transferase, full insert sequence.
1450378_at	2.107	TAP binding protein
1425274_at	2.104	aspartate-beta-hydroxylase
1425483_at	2.103	BB547854 RIKEN full-length enriched, 0 day neonate eyeball Mus musculus cDNA clone E130320N07 3' similar to AB018351 Homo sapiens mRNA for KIAA0808 protein, mRNA sequence.
1425405_a_at	2.102	adenosine deaminase, RNA-specific
1420577_at	2.1	activation-induced cytidine deaminase
1435191_at	2.099	Similar to corneodesmosin precursor; S protein; differentiated keratinocyte S protein precursor (LOC195357), mRNA
1448855_at	2.099	Ras association (RalGDS/AF-6) domain family 1
1417765_a_at	2.098	amylase 1, salivary
1439478_at	2.095	BB500039 RIKEN full-length enriched, 0 day neonate kidney Mus musculus cDNA clone D630024H24 3', mRNA sequence.
1445130_at	2.094	Transcribed sequences
1450034_at	2.092	signal transducer and activator of transcription 1
1452394_at	2.092	cysteinyl-tRNA synthetase
1419381_at	2.091	telomeric repeat binding factor 2, interacting protein
1439631_at	2.088	RIKEN cDNA 6030404K05 gene
1420510_at	2.088	RIKEN cDNA 2810036K01 gene
1430919_at	2.083	RIKEN cDNA 4930525F21 gene
1417961_a_at	2.082	tripartite motif protein 30
1439376_x_at	2.082	BB357590 RIKEN full-length enriched, adult male corpus striatum Mus musculus cDNA clone C030022K04 3' similar to U70017 Mus musculus cyclin D-interacting myb-like protein (Dmp1) mRNA, mRNA sequence.
1459865_x_at	2.078	AV278384 RIKEN full-length enriched, adult male testis (DH10B) Mus musculus cDNA clone 4933401L14 3', mRNA sequence.
1454043_a_at	2.077	potassium voltage-gated channel, shaker-related subfamily, beta member 1
1459560_at	2.075	RIKEN cDNA 4921517N04 gene
1440584_at	2.073	AV377077 RIKEN full-length enriched, adult male cecum Mus musculus cDNA clone 9130221L21 3', mRNA sequence.
1453196_a_at	2.072	2'-5' oligoadenylate synthetase-like 2
1458028_at	2.072	Transcribed sequences
1441883_at	2.071	RIKEN cDNA 0610010O12 gene
1437431_at	2.07	Transcribed sequences
1418158_at	2.068	transformation related protein 63
1427025_at	2.066	DNA segment, Chr 8, ERATO Doi 531, expressed
1457976_at	2.066	mr12f12.x1 Soares mouse 3NbMS Mus musculus cDNA clone IMAGE:597263 3' similar to gb:U15647_cds1 Mus musculus (MOUSE);, mRNA sequence.
1428346_at	2.065	FLN29 gene product
1445532_at	2.065	RIKEN cDNA C230040D10 gene
1426892_at	2.064	utrophin
1429583_at	2.063	Adult male aorta and vein cDNA, RIKEN full-length enriched library, clone:A530030G13 product:unknown EST, full insert sequence
1437333_x_at	2.063	BB833010 RIKEN full-length enriched, mammary gland RCB-0527 Jyg-MC(B) cDNA Mus musculus cDNA clone G930024K19 3', mRNA sequence.
1422243_at	2.062	fibroblast growth factor 7
1444290_at	2.06	six transmembrane epithelial antigen of prostate 2
1422890_at	2.06	protocadherin 18
1421571_a_at	2.059	lymphocyte antigen 6 complex, locus C
1418503_at	2.057	heat shock protein, A
1427979_at	2.055	RIKEN cDNA 4732418C07 gene
1456550_at	2.048	BCL2-like 12 (proline rich)
1442680_at	2.048	Adult male olfactory brain cDNA, RIKEN full-length enriched library, clone:6430501M24 product:unclassifiable, full insert sequence
1418825_at	2.047	interferon inducible protein 1
1443815_x_at	2.047	AV360460 RIKEN full-length enriched, adult male eyeball Mus musculus cDNA clone 7530412M05 3', mRNA sequence.
1453851_a_at	2.047	growth arrest and DNA-damage-inducible 45 gamma
1416164_at	2.046	fibulin 5
1457069_at	2.045	helicase, ATP binding 1
1427540_at	2.044	DNA segment, Chr 10, ERATO Doi 749, expressed
1416942_at	2.043	type 1 tumor necrosis factor receptor shedding aminopeptidase regulator
1416627_at	2.042	serine protease inhibitor, Kunitz type 1
1441543_at	2.041	Transcribed sequences
1456890_at	2.039	RIKEN cDNA 6430573D20 gene
1441795_at	2.033	small nuclear RNA activating complex, polypeptide 4
1434409_at	2.032	Similar to hypothetical protein FLJ20811 (LOC278097), mRNA
1434465_x_at	2.032	very low density lipoprotein receptor
1440644_at	2.03	Transcribed sequences
1455035_s_at	2.03	nucleolar protein 5A
1437959_at	2.029	RIKEN cDNA D430030K24 gene
1453233_s_at	2.029	calreticulin 3
1447711_x_at	2.026	BB265147 RIKEN full-length enriched, 10 days neonate cortex Mus musculus cDNA clone A830019D20 3', mRNA sequence.
1448958_at	2.025	interferon alpha responsive gene
1453391_at	2.025	Adult male testis cDNA, RIKEN full-length enriched library, clone:4930568L21 product:hypothetical protein, full insert sequence
1424921_at	2.025	bromodomain containing 4
1440180_x_at	2.024	AV258279 RIKEN full-length enriched, adult male testis (BNN132) Mus musculus cDNA clone 4923101A10 3', mRNA sequence.
1425722_at	2.023	MRNA similar to interferon-inducible GTPase (cDNA clone MGC:49532 IMAGE:3495064), complete cds
1436120_at	2.021	NOD-derived CD11c +ve dendritic cells cDNA, RIKEN full-length enriched library, clone:F630035N16 product:hypothetical protein, full insert sequence
1422843_at	2.021	5'-3' exoribonuclease 2
1422317_a_at	2.019	interleukin 1 receptor-like 1
1433766_at	2.019	RIKEN cDNA C330023M02 gene
1424211_at	2.018	RIKEN cDNA 5730438N18 gene
1438564_at	2.017	growth arrest specific 2
1454721_at	2.016	RIKEN cDNA 1110018G07 gene
1451498_at	2.016	cDNA sequence BC004853
1436199_at	2.013	tripartite motif-containing 14
1422601_at	2.012	serine (or cysteine) proteinase inhibitor, clade B, member 9
1449143_at	2.008	RIKEN cDNA 5830458K16 gene
1438405_at	2.006	fibroblast growth factor 7
1419422_at	2.005	polycystic kidney disease 2-like 2
1441368_at	2.005	Transcribed sequences
1435208_at	2.001	Transcribed sequence with weak similarity to protein ref:NP_081764.1 (M.musculus) RIKEN cDNA 5730493B19 [Mus musculus]
14M1.4 2F DOWN (48h)
Gene Name	Fold Change	Description
1441922_x_at	0.499	BB322416 RIKEN full-length enriched, adult male adrenal gland Mus musculus cDNA clone B330015J04 3', mRNA sequence.
1417661_at	0.499	RIKEN cDNA 2410008M22 gene
1423250_a_at	0.499	601791518F1 NCI_CGAP_Lu30 Mus musculus cDNA clone IMAGE:4021972 5', mRNA sequence.
1426952_at	0.498	Rho GTPase activating protein 18
1451206_s_at	0.498	pleckstrin homology, Sec7 and coiled-coil domains, binding protein
1429831_at	0.498	phosphoinositide-3-kinase adaptor protein 1
1421408_at	0.497	immunoglobulin superfamily, member 6
1457287_at	0.497	Transcribed sequence with weak similarity to protein ref:NP_079268.1 (H.sapiens) hypothetical protein FLJ12547 [Homo sapiens]
1417632_at	0.496	ATPase, H+ transporting, lysosomal V0 subunit a isoform 1
1447227_at	0.495	Transcribed sequences
1448123_s_at	0.495	transforming growth factor, beta induced
1443098_at	0.495	DEAD (Asp-Glu-Ala-Asp) box polypeptide 1
1426389_at	0.495	RIKEN cDNA E030025C11 gene
1446560_at	0.494	RIKEN cDNA 2310046G15 gene
1438306_at	0.494	RIKEN cDNA 3110001E11 gene
1439028_at	0.494	mb43g04.x1 Soares mouse p3NMF19.5 Mus musculus cDNA clone IMAGE:332214 3', mRNA sequence.
1417303_at	0.493	mevalonate (diphospho) decarboxylase
1416673_at	0.493	beta-site APP-cleaving enzyme 2
1449175_at	0.493	G-protein coupled receptor 65
1447837_x_at	0.492	polymerase (DNA directed), eta (RAD 30 related)
1419394_s_at	0.492	S100 calcium binding protein A8 (calgranulin A)
1452398_at	0.491	phospholipase C, epsilon 1
1443162_at	0.491	Transcribed sequences
1428700_at	0.491	G protein-coupled receptor 86
1434794_at	0.49	ras homolog gene family, member f (in filopodia)
1427007_at	0.49	RIKEN cDNA 1200013B08 gene
1447112_s_at	0.489	crystallin, lamda 1
1429189_at	0.489	Similar to Arylsulfatase B (ASB) (N-acetylgalactosamine-4-sulfatase) (G4S) (LOC218452), mRNA
1427427_at	0.488	apoptosis, caspase activation inhibitor
1448061_at	0.487	macrophage scavenger receptor 1
1429239_a_at	0.487	Mus musculus 0 day neonate skin cDNA, RIKEN full-length enriched library, clone:4632419C16 product:CDNA FLJ30004 FIS, CLONE 3NB691000116, WEAKLY SIMILAR TO STEROIDOGENIC ACUTE REGULATORY PROTEIN PRECURSOR homolog [Homo sapiens], full insert sequence.
1449455_at	0.487	hemopoietic cell kinase
1416759_at	0.486	NEDD9 interacting protein with calponin homology and LIM domains
1415964_at	0.486	stearoyl-Coenzyme A desaturase 1
1425434_a_at	0.486	macrophage scavenger receptor 1
1458059_at	0.485	RAN binding protein 9
1448748_at	0.485	pleckstrin
1423414_at	0.485	prostaglandin-endoperoxide synthase 1
1449405_at	0.485
1436188_a_at	0.484	N-myc downstream regulated 4
1426616_at	0.484	RIKEN cDNA 0610030G03 gene
1440690_at	0.484	13 days embryo heart cDNA, RIKEN full-length enriched library, clone:D330004B22 product:unknown EST, full insert sequence
1420824_at	0.484	sema domain, immunoglobulin domain (Ig), transmembrane domain (TM) and short cytoplasmic domain, (semaphorin) 4D
1439070_x_at	0.483	BB006121 RIKEN full-length enriched, 10 day neonate skin Mus musculus cDNA clone 4732469P11 3', mRNA sequence.
1448590_at	0.483	procollagen, type VI, alpha 1
1442489_at	0.483	HIV-1 Rev binding protein
1446791_at	0.482	Transcribed sequences
1447400_at	0.482	receptor-like tyrosine kinase
1452250_a_at	0.482	procollagen, type VI, alpha 2
1446610_at	0.481	engulfment and cell motility 1, ced-12 homolog (C. elegans)
1420404_at	0.481	CD86 antigen
1451628_a_at	0.48	ankyrin 3, epithelial
1418891_a_at	0.479	RAB3D, member RAS oncogene family
1446149_at	0.479	protein phosphatase 3, catalytic subunit, beta isoform
1434754_at	0.477	AU067654 Sugano mouse brain mncb Mus musculus cDNA clone MNCb-0207 3', mRNA sequence.
1438931_s_at	0.477	sestrin 1
1432916_at	0.477	RIKEN cDNA 5730407I07 gene
1438364_x_at	0.477	AV060923 Mus musculus pancreas C57BL/6J adult Mus musculus cDNA clone 1810066B06, mRNA sequence.
1422698_s_at	0.477	jumonji, AT rich interactive domain 2
1416222_at	0.477	NAD(P) dependent steroid dehydrogenase-like
1419810_x_at	0.476	GLI-Kruppel family member GLI
1433398_at	0.476	FYVE, RhoGEF and PH domain containing 3
1426983_at	0.475	formin binding protein 1
1448600_s_at	0.475	vav 3 oncogene
1435630_s_at	0.475	AV148646 Mus musculus C57BL/6J 10-11 day embryo Mus musculus cDNA clone 2810480N06, mRNA sequence.
1422932_a_at	0.475	vav 1 oncogene
1416454_s_at	0.474	actin, alpha 2, smooth muscle, aorta
1456439_x_at	0.473	NEDD9 interacting protein with calponin homology and LIM domains
1437268_at	0.472	RIKEN cDNA 6030463G20 gene
1417721_s_at	0.472	lysosomal-associated protein transmembrane 5
1425227_a_at	0.471	ATPase, H+ transporting, lysosomal V0 subunit a isoform 1
1449824_at	0.47	proteoglycan 4 (megakaryocyte stimulating factor, articular superficial zone protein)
1452679_at	0.47	Transcribed sequence with strong similarity to protein ref:NP_001060.1 (H.sapiens) tubulin, beta polypeptide [Homo sapiens]
1455106_a_at	0.469	creatine kinase, brain
1419283_s_at	0.469
1421075_s_at	0.469	cytochrome P450, family 7, subfamily b, polypeptide 1
1444606_at	0.469	ephrin A2
1438467_at	0.469	macrophage galactose N-acetyl-galactosamine specific lectin 2
1435343_at	0.468	dedicator of cytokinesis 10
1426615_s_at	0.468	N-myc downstream regulated 4
1416178_a_at	0.468	pleckstrin homology domain containing, family B (evectins) member 1
1456046_at	0.468	complement component 1, q subcomponent, receptor 1
1436406_at	0.467	4 days neonate male adipose cDNA, RIKEN full-length enriched library, clone:B430304M13 product:unknown EST, full insert sequence
1418890_a_at	0.467	RAB3D, member RAS oncogene family
1441760_at	0.467	ii18e04.x1 Melton Amplified Mouse E16 5 Pancreas 3 M16S1 A Mus musculus cDNA clone IMAGE:5942095 3' similar to SW:RS25_HUMAN P25111 40S RIBOSOMAL PROTEIN S25. ;, mRNA sequence.
1428331_at	0.467	RIKEN cDNA 2210016F16 gene
1434404_at	0.467	RIKEN cDNA C030011O14 gene
1416333_at	0.466	downstream of tyrosine kinase 2
1417871_at	0.466	hydroxysteroid (17-beta) dehydrogenase 7
1416645_a_at	0.464	albumin 1
1456307_s_at	0.464	adenylate cyclase 7
1437771_at	0.464	2 days pregnant adult female oviduct cDNA, RIKEN full-length enriched library, clone:E230025L24 product:hypothetical protein, full insert sequence
1423590_at	0.464	kidney-derived aspartic protease-like protein
1448620_at	0.464	Fc receptor, IgG, low affinity IIb
1433827_at	0.464	ATPase, aminophospholipid transporter (APLT), class I, type 8A, member 1
1419442_at	0.463	Mus musculus matrilin 2, mRNA (cDNA clone MGC:5875 IMAGE:3492881), complete cds.
1421199_at	0.463	discs, large homolog 2 (Drosophila)
1455978_a_at	0.463	BB338441 RIKEN full-length enriched, 10 days neonate cerebellum Mus musculus cDNA clone B930013H05 3' similar to U69262 Mus musculus matrilin-2 precursor mRNA, mRNA sequence.
1429055_at	0.462	RIKEN cDNA 4930506M07 gene
1435793_at	0.462	hypothetical protein 4632417K02
1419773_at	0.461	RIKEN cDNA 2010301N04 gene
1423489_at	0.461	monocyte to macrophage differentiation-associated
1453435_a_at	0.461	Mus musculus adult male tongue cDNA, RIKEN full-length enriched library, clone:2310042I22 product:unknown EST, full insert sequence.
1446331_at	0.46	15 days embryo head cDNA, RIKEN full-length enriched library, clone:D930037F10 product:unknown EST, full insert sequence
1451363_a_at	0.459	RIKEN cDNA 2010308M01 gene
1422904_at	0.459	flavin containing monooxygenase 2
1434307_at	0.459	RIKEN cDNA 9630015D15 gene
1440436_at	0.458	7 days neonate cerebellum cDNA, RIKEN full-length enriched library, clone:A730030A06 product:unknown EST, full insert sequence
1438160_x_at	0.458	AV348121 RIKEN full-length enriched, adult male olfactory bulb Mus musculus cDNA clone 6430631M08 3', mRNA sequence.
1433044_at	0.458	chondroitin sulfate proteoglycan 2
1438730_at	0.457	neuron navigator 1
1457248_x_at	0.457	BB554029 RIKEN full-length enriched, 2 days pregnant adult female ovary Mus musculus cDNA clone E330010H16 3', mRNA sequence.
1438007_at	0.457	expressed sequence AI851790
1428018_a_at	0.457	immunoglobulin superfamily, member 7
1423488_at	0.457	monocyte to macrophage differentiation-associated
1448898_at	0.456	chemokine (C-C motif) ligand 9
1444676_at	0.455	0 day neonate thymus cDNA, RIKEN full-length enriched library, clone:A430066N02 product:unknown EST, full insert sequence
1434015_at	0.455	solute carrier family 2 (facilitated glucose transporter), member 6
1422533_at	0.454	cytochrome P450, 51
1426239_s_at	0.454	arrestin, beta 2
1450922_a_at	0.453	601791518F1 NCI_CGAP_Lu30 Mus musculus cDNA clone IMAGE:4021972 5', mRNA sequence.
1436186_at	0.453	RIKEN cDNA 4432406C08 gene
1450065_at	0.453	adenylate cyclase 7
1441975_at	0.453	acid phosphatase, prostate
1438778_at	0.452	Adult male spinal cord cDNA, RIKEN full-length enriched library, clone:A330052J17 product:unknown EST, full insert sequence
1419202_at	0.452	cystatin F (leukocystatin)
1439599_at	0.452	BB796863 RIKEN full-length enriched, adult male intestinal mucosa Mus musculus cDNA clone G630001I07 3', mRNA sequence.
1438973_x_at	0.451	BB043407 RIKEN full-length enriched, 13 days embryo male testis Mus musculus cDNA clone 6030473G23 3', mRNA sequence.
1419519_at	0.45	insulin-like growth factor 1
1429240_at	0.449	Mus musculus 0 day neonate skin cDNA, RIKEN full-length enriched library, clone:4632419C16 product:CDNA FLJ30004 FIS, CLONE 3NB691000116, WEAKLY SIMILAR TO STEROIDOGENIC ACUTE REGULATORY PROTEIN PRECURSOR homolog [Homo sapiens], full insert sequence.
1434100_x_at	0.449	RIKEN cDNA A830037N07 gene
1415871_at	0.449	transforming growth factor, beta induced
1425584_x_at	0.449	Mus musculus cDNA clone MGC:6728 IMAGE:3588654, complete cds.
1427371_at	0.448	ATP-binding cassette, sub-family A (ABC1), member 8a
1420703_at	0.448	Transcribed sequences
1415824_at	0.447	stearoyl-Coenzyme A desaturase 2
1437071_at	0.447	eukaryotic translation initiation factor 1A, Y-linked
1433711_s_at	0.446	sestrin 1
1435290_x_at	0.446	histocompatibility 2, class II antigen A, alpha
1418110_a_at	0.445	inositol polyphosphate-5-phosphatase D
1422707_at	0.445	phosphoinositide-3-kinase, catalytic, gamma polypeptide
1421074_at	0.445	cytochrome P450, family 7, subfamily b, polypeptide 1
1448407_at	0.445	RIKEN cDNA 4632428N05 gene
1434067_at	0.444	uw45e08.x1 Soares_mammary_gland_NMLMG Mus musculus cDNA clone IMAGE:3464966 3', mRNA sequence.
1450923_at	0.444	601791518F1 NCI_CGAP_Lu30 Mus musculus cDNA clone IMAGE:4021972 5', mRNA sequence.
1448534_at	0.444	protein tyrosine phosphatase, non-receptor type substrate 1
1423145_a_at	0.443	titin-cap
1448619_at	0.442	7-dehydrocholesterol reductase
1429676_at	0.44	RIKEN cDNA 2210408O09 gene
1448254_at	0.439	pleiotrophin
1416985_at	0.439	protein tyrosine phosphatase, non-receptor type substrate 1
1445566_at	0.439	Transcribed sequences
1423418_at	0.439	farnesyl diphosphate synthetase
1454086_a_at	0.438	LIM domain only 2
1416714_at	0.438	interferon consensus sequence binding protein 1
1416111_at	0.438	CD83 antigen
1434069_at	0.437	Adult male testis cDNA, RIKEN full-length enriched library, clone:4930413J11 product:mitochondria located 1 homolog (human), full insert sequence
1450455_s_at	0.437	aldo-keto reductase family 1, member C12
1459873_x_at	0.437	BB050303 RIKEN full-length enriched, 12 days embryo male wolffian duct Mus musculus cDNA clone 6720405G18 3' similar to U92544 Human hepatocellular carcinoma associated protein (JCL-1) mRNA, mRNA sequence.
1420928_at	0.436	beta galactoside alpha 2,6 sialyltransferase 1
1456893_at	0.436	maa70g11.x1 Soares mouse 3NbMS Mus musculus cDNA clone IMAGE:3822165 3' similar to TR:Q63289 Q63289 L1 RETROPOSON, ORF2 MRNA ;, mRNA sequence.
1435462_at	0.434	15 days embryo head cDNA, RIKEN full-length enriched library, clone:D930035P11 product:unknown EST, full insert sequence
1434068_s_at	0.434	uw45e08.x1 Soares_mammary_gland_NMLMG Mus musculus cDNA clone IMAGE:3464966 3', mRNA sequence.
1425884_at	0.434	brix domain containing 1
1418085_at	0.434	protein kinase C, zeta
1435050_at	0.433	DNA segment, Chr 10, Brigham & Women's Genetics 1379 expressed
1439830_at	0.432	mitogen activated protein kinase kinase kinase 5
1419482_at	0.431	complement component 3a receptor 1
1419194_s_at	0.43	glia maturation factor, gamma
1422479_at	0.43	acetyl-Coenzyme A synthetase 2 (ADP forming)
1443349_at	0.429	Transcribed sequences
1435157_at	0.429	2 days pregnant adult female ovary cDNA, RIKEN full-length enriched library, clone:E330013P17 product:unknown EST, full insert sequence
1417979_at	0.428	tenomodulin
1424902_at	0.427	plexin domain containing 1
1425284_a_at	0.427	RAB27A, member RAS oncogene family
1426301_at	0.427	activated leukocyte cell adhesion molecule
1442410_at	0.427	expressed sequence AV016528
1456694_x_at	0.426	hemopoietic cell phosphatase
1416986_a_at	0.425	protein tyrosine phosphatase, non-receptor type substrate 1
1439425_x_at	0.425	cDNA sequence BC024814
1447211_at	0.425	nuclear receptor interacting protein 1
1418641_at	0.425	lymphocyte cytosolic protein 2
1433741_at	0.424	CD38 antigen
1455231_s_at	0.424	RIKEN cDNA 2310011J03 gene
1421425_a_at	0.424	Down syndrome critical region gene 1-like 1
1435750_at	0.424	RIKEN cDNA 2010323F13 gene
1421214_at	0.423	cytidine monophospho-N-acetylneuraminic acid hydroxylase
1457753_at	0.423	Similar to toll-like receptor (LOC279572), mRNA
1423804_a_at	0.422	isopentenyl-diphosphate delta isomerase
1441962_at	0.421	hypothetical protein F730011J02
1420699_at	0.421	C-type (calcium dependent, carbohydrate recognition domain) lectin, superfamily member 12
1418187_at	0.421	receptor (calcitonin) activity modifying protein 2
1420818_at	0.42	src-like adaptor
1424709_at	0.42	sterol-C5-desaturase (fungal ERG3, delta-5-desaturase) homolog (S. cerevisae)
1440517_x_at	0.419	cytidine monophospho-N-acetylneuraminic acid hydroxylase
1420653_at	0.419	transforming growth factor, beta 1
1417300_at	0.419	acid sphingomyelinase-like phosphodiesterase
1444451_at	0.418	12 days embryo embryonic body between diaphragm region and neck cDNA, RIKEN full-length enriched library, clone:9430076M13 product:unknown EST, full insert sequence
1418747_at	0.418	SFFV proviral integration 1
1439999_at	0.418	Transcribed sequences
1438303_at	0.417	transforming growth factor, beta 2
1416882_at	0.416	regulator of G-protein signalling 10
1430447_a_at	0.415	DNA segment, Chr 7, Brigham & Women's Genetics 0421 expressed
1425037_at	0.415	FYVE, RhoGEF and PH domain containing 4
1430534_at	0.415	ribonuclease A family, member 6
1436448_a_at	0.414	prostaglandin-endoperoxide synthase 1
1426620_at	0.414	BB549997 RIKEN full-length enriched, 2 days pregnant adult female oviduct Mus musculus cDNA clone E230019N14 3' similar to AF022729 Rattus norvegicus HNK-1 sulfotransferase mRNA, mRNA sequence.
1434581_at	0.414	RIKEN cDNA 2410066E13 gene
1455011_at	0.413	StAR-related lipid transfer (START) domain containing 4
1452654_at	0.411	zinc finger, DHHC domain containing 2
1444726_at	0.411	Transcribed sequences
1424302_at	0.411	paired-Ig-like receptor B
1460012_at	0.41	RIKEN cDNA 1700015L13 gene
1426025_s_at	0.41
1421457_a_at	0.408	SAM domain, SH3 domain and nuclear localisation signals, 1
1416326_at	0.408	cysteine-rich protein 1 (intestinal)
1417403_at	0.408	ELOVL family member 6, elongation of long chain fatty acids (yeast)
1454728_s_at	0.407	ATPase, aminophospholipid transporter (APLT), class I, type 8A, member 1
1453691_at	0.407	RIKEN cDNA 4921528I07 gene
1448749_at	0.406	pleckstrin
1428242_at	0.406	RIKEN cDNA 6330406L22 gene
1426454_at	0.404	Rho, GDP dissociation inhibitor (GDI) beta
1453287_at	0.403	RIKEN cDNA 0610012A05 gene
1449682_s_at	0.403	18-day embryo whole body cDNA, RIKEN full-length enriched library, clone:1100001P14 product:TUBULIN, BETA 5 homolog [Homo sapiens], full insert sequence
1452592_at	0.402	microsomal glutathione S-transferase 2
1436171_at	0.402	13 days embryo male testis cDNA, RIKEN full-length enriched library, clone:6030405P05 product:unclassifiable, full insert sequence
1456960_at	0.402	2 days pregnant adult female ovary cDNA, RIKEN full-length enriched library, clone:E330016N04 product:unknown EST, full insert sequence
1417597_at	0.402	CD28 antigen
1435703_at	0.399	RIKEN cDNA 2810457I06 gene
1453025_at	0.396	RIKEN cDNA 1110033L15 gene
1441566_at	0.396	Transcribed sequences
1420970_at	0.396	adenylate cyclase 7
1428733_at	0.395	guanine nucleotide binding protein (G protein), gamma transducing activity polypeptide 2
1425519_a_at	0.395	Ia-associated invariant chain
1455337_at	0.395	FYVE, RhoGEF and PH domain containing 4
1429268_at	0.394	RIKEN cDNA 2610318N02 gene
1416114_at	0.394	SPARC-like 1 (mast9, hevin)
1416795_at	0.393	crystallin, lamda 1
1418796_at	0.392	stem cell growth factor
1450678_at	0.391	integrin beta 2
1419335_at	0.39	RIKEN cDNA 4930441O14 gene
1429954_at	0.39	RIKEN cDNA 3110037K17 gene
1416034_at	0.39	CD24a antigen
1449164_at	0.389	CD68 antigen
1460218_at	0.389	CD52 antigen
1418403_at	0.387	a disintegrin and metalloproteinase domain 19 (meltrin beta)
1435040_at	0.386	interleukin-1 receptor-associated kinase 3
1435640_x_at	0.386	uv85h11.x1 Soares mouse 3NbMS Mus musculus cDNA clone IMAGE:3414021 3' similar to TR:O73505 O73505 POL PROTEIN. ;, mRNA sequence.
1434099_at	0.386	RIKEN cDNA A830037N07 gene
1456500_at	0.386	hypothetical protein 4632417K02
1432063_at	0.386	0 day neonate head cDNA, RIKEN full-length enriched library, clone:4833427F10 product:unknown EST, full insert sequence
1456548_at	0.384	RIKEN cDNA 2610103J23 gene
1425888_at	0.384	killer cell lectin-like receptor, subfamily A, member 17
1434877_at	0.384	neuronal pentraxin 1
1440284_at	0.383	Transcribed sequences
1437502_x_at	0.383	BB560574 RIKEN full-length enriched, 10 days neonate olfactory brain Mus musculus cDNA clone E530111O22 3' similar to X53825 M.musculus mRNA for heat stable antigen, mRNA sequence.
1417404_at	0.382	ELOVL family member 6, elongation of long chain fatty acids (yeast)
1437152_at	0.381	RIKEN cDNA 4931439A04 gene
1425214_at	0.381	pyrimidinergic receptor P2Y, G-protein coupled, 6
1448182_a_at	0.381	CD24a antigen
1436905_x_at	0.381	lysosomal-associated protein transmembrane 5
1451122_at	0.381	isopentenyl-diphosphate delta isomerase
1424714_at	0.38	aldolase 3, C isoform
1419631_at	0.379	Wiskott-Aldrich syndrome homolog (human)
1451161_a_at	0.379	EGF-like module containing, mucin-like, hormone receptor-like sequence 1
1422124_a_at	0.379	protein tyrosine phosphatase, receptor type, C
1442082_at	0.377	complement component 3a receptor 1
1419483_at	0.376	complement component 3a receptor 1
1428156_at	0.375	15 days embryo male testis cDNA, RIKEN full-length enriched library, clone:8030491K24 product:unknown EST, full insert sequence
1429525_s_at	0.375	myosin IF
1460682_s_at	0.374	CEA-related cell adhesion molecule 2
1450019_at	0.374	chemokine (C-X3-C) receptor 1
1448663_s_at	0.373	mevalonate (diphospho) decarboxylase
1432147_at	0.373	Adult male testis cDNA, RIKEN full-length enriched library, clone:4930447F24 product:unknown EST, full insert sequence
1416002_x_at	0.373	coactosin-like 1 (Dictyostelium)
1429524_at	0.372	myosin IF
1422123_s_at	0.371	CEA-related cell adhesion molecule 1
1419561_at	0.37	chemokine (C-C motif) ligand 3
1459740_s_at	0.369	um25g11.x1 Sugano mouse embryo mewa Mus musculus cDNA clone IMAGE:2225636 3' similar to SW:UCP2_MOUSE P70406 MITOCHONDRIAL UNCOUPLING PROTEIN 2 ;, mRNA sequence.
1441776_at	0.369	RIKEN cDNA 1110014F12 gene
1423593_a_at	0.369	colony stimulating factor 1 receptor
1433963_a_at	0.367	cDNA sequence BC032204
1424927_at	0.366	GLI pathogenesis-related 1 (glioma)
1437886_at	0.366	kelch-like 6 (Drosophila)
1449454_at	0.366	bone marrow stromal cell antigen 1
1436736_x_at	0.365	BB369191 RIKEN full-length enriched, 16 days embryo head Mus musculus cDNA clone C130047C13 3' similar to D45203 Mouse pentylenetetrazol-related mRNA PTZ-17 (3'UTR of E3.1), mRNA sequence.
1454699_at	0.364	sestrin 1
1448561_at	0.363	neutrophil cytosolic factor 2
1458802_at	0.363	human immunodeficiency virus type I enhancer binding protein 3
1417378_at	0.362	immunoglobulin superfamily, member 4A
1455269_a_at	0.36	coronin, actin binding protein 1A
1439034_at	0.359	BB160586 RIKEN full-length enriched, 16 days neonate thymus Mus musculus cDNA clone A130054A12 3' similar to Y00090 Rat mRNA for leukosialin, mRNA sequence.
1427327_at	0.359	paired immunoglobin-like type 2 receptor alpha
1419872_at	0.358	mi30h09.x1 Soares mouse embryo NbME13.5 14.5 Mus musculus cDNA clone IMAGE:465089 3' similar to gb:X03663_cds1 MACROPHAGE COLONY STIMULATING FACTOR I RECEPTOR (HUMAN); gb:X06368 Murine mRNA for c-fms proto-oncogene (MOUSE);, mRNA sequence.
1451895_a_at	0.358	Mus musculus mRNA similar to dual specificity phosphatase 9 (cDNA clone MGC:6681 IMAGE:3501447), complete cds.
1444299_at	0.358	0 day neonate thymus cDNA, RIKEN full-length enriched library, clone:A430093F15 product:hypothetical protein, full insert sequence
1460239_at	0.357	transmembrane 4 superfamily member 13
1426255_at	0.356	neurofilament, light polypeptide
1451353_at	0.355	transmembrane 6 superfamily member 1
1456772_at	0.354	neutrophil cytosolic factor 1
1435144_at	0.354	FYN binding protein
1443208_at	0.354	12 days embryo male wolffian duct includes surrounding region cDNA, RIKEN full-length enriched library, clone:6720487G18 product:unknown EST, full insert sequence
1418457_at	0.352	chemokine (C-X-C motif) ligand 14
1448326_a_at	0.352	cellular retinoic acid binding protein I
1449363_at	0.349	activating transcription factor 3
1437401_at	0.348	insulin-like growth factor 1
1452016_at	0.347	arachidonate 5-lipoxygenase activating protein
1423635_at	0.347	bone morphogenetic protein 2
1448437_a_at	0.346	GTP binding protein 2
1427072_at	0.345	START domain containing 8
1417860_a_at	0.345	spondin 2, extracellular matrix protein
1436346_at	0.344	CD109 antigen
1459497_at	0.344	Transcribed sequences
1434520_at	0.344	sterol-C5-desaturase (fungal ERG3, delta-5-desaturase) homolog (S. cerevisae)
1444176_at	0.344	ATPase, H+ transporting, V0 subunit D, isoform 2
1448188_at	0.343	uncoupling protein 2, mitochondrial
1455324_at	0.341	15 days embryo head cDNA, RIKEN full-length enriched library, clone:D930035P11 product:unknown EST, full insert sequence
1456014_s_at	0.341	BB113173 RIKEN full-length enriched, adult male urinary bladder Mus musculus cDNA clone 9530038P09 3', mRNA sequence.
1425658_at	0.34	CD109 antigen
1451767_at	0.34	601218843F1 NCI_CGAP_Lu29 Mus musculus cDNA clone IMAGE:3587723 5', mRNA sequence.
1422415_at	0.339	synonyms: Angrp, Rnase5b; angiogenin related protein; go_component: extracellular space [goid 0005615] [evidence TAS] [pmid 12466851]; go_function: nucleic acid binding [goid 0003676] [evidence IEA]; go_function: endonuclease activity [goid 0004519] [evidence IEA]; go_function: hydrolase activity [goid 0016787] [evidence IEA]; go_function: nuclease activity [goid 0004518] [evidence IEA]; go_funct…
1420919_at	0.336	serum/glucocorticoid regulated kinase 3
1423396_at	0.333	Mus musculus adult male cerebellum cDNA, RIKEN full-length enriched library, clone:1500005L23 product:angiotensinogen, full insert sequence.
1437467_at	0.331	activated leukocyte cell adhesion molecule
1456569_x_at	0.331	gelsolin
1451780_at	0.329	B-cell linker
1454672_at	0.329	neurofilament, light polypeptide
1419873_s_at	0.329	mi30h09.x1 Soares mouse embryo NbME13.5 14.5 Mus musculus cDNA clone IMAGE:465089 3' similar to gb:X03663_cds1 MACROPHAGE COLONY STIMULATING FACTOR I RECEPTOR (HUMAN); gb:X06368 Murine mRNA for c-fms proto-oncogene (MOUSE);, mRNA sequence.
1417645_at	0.328	sarcospan
1423569_at	0.327	glycine amidinotransferase (L-arginine:glycine amidinotransferase)
1450839_at	0.327	DNA segment, human D4S114
1440339_at	0.326	0 day neonate head cDNA, RIKEN full-length enriched library, clone:4833416E15 product:unknown EST, full insert sequence
1425385_a_at	0.324	immunoglobulin heavy chain 1a (serum IgG2a)
1448160_at	0.321	lymphocyte cytosolic protein 1
1417620_at	0.321	RAS-related C3 botulinum substrate 2
1431724_a_at	0.32	purinergic receptor P2Y, G-protein coupled 12
1450792_at	0.32	TYRO protein tyrosine kinase binding protein
1446998_at	0.32	Transcribed sequences
1424443_at	0.318	transmembrane 6 superfamily member 1
1418340_at	0.318	Fc receptor, IgE, high affinity I, gamma polypeptide
1415983_at	0.317	lymphocyte cytosolic protein 1
1452123_s_at	0.312	RIKEN cDNA 6030440G05 gene
1446987_at	0.311	Transcribed sequence with moderate similarity to protein pir:S12207 (M.musculus) S12207 hypothetical protein
1454674_at	0.309	fasciculation and elongation protein zeta 1 (zygin I)
1437811_x_at	0.309	AV312368 RIKEN full-length enriched, adult male thymus Mus musculus cDNA clone 5830401O15 3', mRNA sequence.
1436838_x_at	0.305	BB160417 RIKEN full-length enriched, 16 days neonate thymus Mus musculus cDNA clone A130053B20 3', mRNA sequence.
1452956_a_at	0.304	DNA segment, Chr 12, ERATO Doi 647, expressed
1449389_at	0.303	T-cell acute lymphocytic leukemia 1
1438475_at	0.302	13 days embryo male testis cDNA, RIKEN full-length enriched library, clone:6030438F01 product:unclassifiable, full insert sequence
1435477_s_at	0.298	Fc receptor, IgG, low affinity IIb
1439622_at	0.298	Ras association (RalGDS/AF-6) domain family 4
1434413_at	0.297	insulin-like growth factor 1
1417376_a_at	0.296	immunoglobulin superfamily, member 4A
1434798_at	0.295	ATPase, H+ transporting, V0 subunit D, isoform 2
1434657_at	0.295	glutaminase
1450435_at	0.293	L1 cell adhesion molecule
1441749_at	0.289	Adult male testis cDNA, RIKEN full-length enriched library, clone:4930447F24 product:unknown EST, full insert sequence
1422046_at	0.282	integrin alpha M
1434945_at	0.28	hypothetical protein A330042H22
1455840_at	0.279	Rap guanine nucleotide exchange factor (GEF) 5
1419032_at	0.279	Transcribed sequence with weak similarity to protein pir:I58401 (M.musculus) I58401 protein-tyrosine kinase
1429123_at	0.276	RAB27A, member RAS oncogene family
1448649_at	0.276	glutamyl aminopeptidase
1451941_a_at	0.276	Fc receptor, IgG, low affinity IIb
1448416_at	0.275	matrix gamma-carboxyglutamate (gla) protein
1441750_x_at	0.272	Adult male testis cDNA, RIKEN full-length enriched library, clone:4930447F24 product:unknown EST, full insert sequence
1425538_x_at	0.268	CEA-related cell adhesion molecule 1
1422808_s_at	0.267	dedicator of cyto-kinesis 2
1418643_at	0.266	transmembrane 4 superfamily member 13
1455137_at	0.266	Rap guanine nucleotide exchange factor (GEF) 5
1455332_x_at	0.263	Fc receptor, IgG, low affinity IIb
1420331_at	0.262	C-type (calcium dependent, carbohydrate recognition domain) lectin, superfamily member 9
1420591_at	0.261	G protein-coupled receptor 84
1460684_at	0.26	transmembrane 7 superfamily member 2
1419193_a_at	0.257	glia maturation factor, gamma
1454757_s_at	0.256	DNA segment, Chr 12, ERATO Doi 647, expressed
1439902_at	0.254	Transcribed sequences
1455735_at	0.253	Transcribed sequences
1416246_a_at	0.251	coronin, actin binding protein 1A
1417377_at	0.25	immunoglobulin superfamily, member 4A
1443894_at	0.244	ecotropic viral integration site 2a
1438169_a_at	0.235	BB009122 RIKEN full-length enriched, 10 day neonate skin Mus musculus cDNA clone 4732488B06 3', mRNA sequence.
1420361_at	0.234	solute carrier family 11 (proton-coupled divalent metal ion transporters), member 1
1418809_at	0.232	synonyms: 6M21, Ly89, PIR-A1; Mus musculus paired-Ig-like receptor A1 (Pira1), mRNA.
1420464_s_at	0.225	paired-Ig-like receptor A6
1452279_at	0.221	properdin factor, complement
1425714_a_at	0.221	RIKEN cDNA 4921501M20 gene
1417346_at	0.22	apoptosis-associated speck-like protein containing a CARD
1427329_a_at	0.22	immunoglobulin heavy chain 6 (heavy chain of IgM)
1451718_at	0.216	proteolipid protein (myelin)
1434881_s_at	0.201	potassium channel tetramerisation domain containing 12
1419186_a_at	0.187	sialyltransferase 8 (alpha-2, 8-sialyltransferase) D
1451461_a_at	0.176	aldolase 3, C isoform
1417552_at	0.175	fibroblast activation protein
1452114_s_at	0.171	insulin-like growth factor binding protein 5
1436530_at	0.161	Clone IMAGE:1348774, mRNA
1417381_at	0.141	complement component 1, q subcomponent, alpha polypeptide
1422313_a_at	0.131	insulin-like growth factor binding protein 5
1450020_at	0.0954	chemokine (C-X3-C) receptor 1
